# Supplementary material for: Descriptive Epidemiology of Somatising Tendency: Findings from the CUPID Study
Source: PLoS One. 2016 Apr 29;11(4):e0153748. doi: 10.1371/journal.pone.0153748 (PMC4851348; doi:10.1371/journal.pone.0153748)
Supplement: S1 Metadata — (XLSX) [file pone.0153748.s003.xlsx]

## Sheet: Variables
Variable name	Label	Type
serialx	serial number	TEXT
sex	Q2 sex	INTEGER
endeducn	Q5 age finished f/t education	INTEGER
faint7	Q49a) faintness or dizziness past 7 days	INTEGER
chestpn7	Q49b) chest or heart pain past 7 days	INTEGER
nausea7	Q49c) nausea/upset stomach past 7 days	INTEGER
breath7	Q49d) breathlessness past 7 days	INTEGER
numb7	Q49e) numbness/tingling past 7 days	INTEGER
weak7	Q49f) weakness past 7 days	INTEGER
hotcold7	Q49g) hot or cold spells past 7 days	INTEGER
othabs12	Q51b) days absent other illness in past yr	INTEGER
country	Country	INTEGER
ageband	Age (4grps)	INTEGER
smokest	Smoking status (3 cats)	INTEGER
ms_combined	Combined MS absence	INTEGER
othabs12_any	Any absence for other illness in past yr	INTEGER
lbp1a	Low back pain in past month (recoded)	INTEGER
nkp1a	Neck pain in past month (recoded)	INTEGER
shp1a	Shoulder pain in past month (recoded)	INTEGER
elp1a	Elbow pain in past month (recoded)	INTEGER
whp1a	Wrist/hand pain in past month (recoded)	INTEGER
knp1a	Knee pain in past month (recoded)	INTEGER
occupation	Occupation	INTEGER
occ	Occupational group	INTEGER
Bfaint	FUP: Q23a faintness or dizziness past 7 days	INTEGER
Bchestpn	FUP: Q23b chest or heart pain past 7 days	INTEGER
Bnausea	FUP: Q23c nausea/upset stomach past 7 days	INTEGER
Bbreath	FUP: Q23d breathlessness past 7 days	INTEGER
Bnumb	FUP: Q23e numbness/tingling past 7 days	INTEGER
Bweak	FUP: Q23f weakness past 7 days	INTEGER
Bhotcold	FUP: Q23g hot or cold spells past 7 days	INTEGER
fup	Follow-up time	INTEGER
faint7_a	RECODE of faint7 (Q49a) faintness or dizziness past 7 days )	INTEGER
chestpn7_a	RECODE of chestpn7 (Q49b) chest or heart pain past 7 days)	INTEGER
nausea7_a	RECODE of nausea7 (Q49c) nausea/upset stomach past 7 days)	INTEGER
breath7_a	RECODE of breath7 (Q49d) breathlessness past 7 days)	INTEGER
hotcold7_a	RECODE of hotcold7 (Q49g) hot or cold spells past 7 days)	INTEGER
weak7_a	RECODE of weak7 (Q49f) weakness past 7 days)	INTEGER
numb7_a	RECODE of numb7 (Q49e) numbness/tingling past 7 days)	INTEGER
somt7	faint7_a chestpn7_a nausea7_a breath7_a hotcold7_a weak7_a numb7_a == 1	INTEGER
language	Language	INTEGER
occup	Occupation (recoded)	INTEGER
non_msabs	Sickness absence for >5 days in the past 12 months for non-MS illness	INTEGER
educ	Age left education	INTEGER
anyabs	Any sickness absence (MS or non-MS)	INTEGER
whp1r	Right wrist/hand pain	INTEGER
shp1r	Right shoulder pain	INTEGER
elp1r	Right elbow pain	INTEGER
knp1r	Right knee pain	INTEGER
whp1l	Left wrist/hand pain	INTEGER
shp1l	Left shoulder pain	INTEGER
elp1l	Left elbow pain	INTEGER
knp1l	Left knee pain	INTEGER
multipn	Multisite pain (0-10)	INTEGER

## Sheet: Categories
	Value	Label
sex	1	male
	2	female
	9	not known
endeducn	1	<14
	2	14-16
	3	17-19
	4	20+
	9	not known
faint7	0	not at all
	1	a little bit
	2	moderately
	3	quite a bit
	4	extremely
	9	not known
chestpn7	0	not at all
	1	a little bit
	2	moderately
	3	quite a bit
	4	extremely
	9	not known
nausea7	0	not at all
	1	a little bit
	2	moderately
	3	quite a bit
	4	extremely
	9	not known
breath7	0	not at all
	1	a little bit
	2	moderately
	3	quite a bit
	4	extremely
	9	not known
numb7	0	not at all
	1	a little bit
	2	moderately
	3	quite a bit
	4	extremely
	9	not known
weak7	0	not at all
	1	a little bit
	2	moderately
	3	quite a bit
	4	extremely
	9	not known
hotcold7	0	not at all
	1	a little bit
	2	moderately
	3	quite a bit
	4	extremely
	9	not known
othabs12	0	0 days
	1	1-5 days
	2	6-30 days
	3	>30 days
	9	not known
country	1	Australia
	2	Brazil
	3	Costa Rica
	4	Nicaragua
	5	Ecuador
	6	UK
	8	South Africa
	9	Spain
	10	Colombia
	11	Iran
	12	Italy
	13	Japan
	15	Lebanon
	16	Estonia
	17	Pakistan
	20	Sri Lanka
	21	Greece
	22	New Zealand
ageband	0	20-29
	1	30-39
	2	40-49
	3	50-59
smokest	1	Never smoker
	2	Ex smoker
	3	Current smoker
	9	Not known
ms_combined	0	0 days
	1	>0 days
	8	Not applicable
	9	Not known
othabs12_any	0	0 days
	1	>0 day
	9	Not known
lbp1a	0	No
	1	Yes
	9	Not known
nkp1a	0	No
	1	Yes
	9	Not known
shp1a	0	No
	1	Yes
	9	Not known
elp1a	0	No
	1	Yes
	9	Not known
whp1a	0	No
	1	Yes
	9	Not known
knp1a	0	No
	1	Yes
	9	Not known
occupation	1	Nurses
	2	Office workers
	3	Manual workers
	4	Other
occ	1	Nurses (BR)
	2	Office workers (BR)
	3	Manual workers (BR)
	4	Nurses (EC)
	5	Office workers (EC)
	6	Manual workers (EC)
	7	Office workers (CO)
	8	Nurses (CR)
	9	Office workers (CR)
	10	Manual workers (CR)
	11	Nurses (NI)
	12	Office workers (NI)
	13	Manual workers (NI)
	14	Nurses (UK)
	15	Office workers (UK)
	16	Manual workers (UK)
	17	Nurses (SP)
	18	Office workers (SP)
	19	Nurses (IT)
	20	Manual workers (IT)
	21	Nurses (GR)
	22	Office workers (GR)
	23	Manual workers (GR)
	24	Nurses (EE)
	25	Office workers (EE)
	26	Nurses (LB)
	27	Office workers (LB)
	28	Manual workers (LB)
	29	Nurses (IR)
	30	Office workers (IR)
	31	Nurses (PK)
	32	Office workers (PK)
	33	Manual workers (PK)
	34	Nurses (LK)
	35	Office workers (LK)
	36	Manual workers-1 (LK)
	37	Manual workers-2 (LK)
	38	Nurses (JP)
	39	Office workers (JP)
	40	Manual workers (JP)
	41	Sales workers (JP)
	42	Nurses (SA)
	43	Office workers (SA)
	44	Nurses (AU)
	45	Nurses (NZ)
	46	Office workers (NZ)
	47	Manual workers (NZ)
Bfaint	0	0 Not at all
	1	1 A little bit
	2	2 Moderately
	3	3 Quite a bit
	4	4 Extremely
Bchestpn	0	0 Not at all
	1	1 A little bit
	2	2 Moderately
	3	3 Quite a bit
	4	4 Extremely
Bnausea	0	0 Not at all
	1	1 A little bit
	2	2 Moderately
	3	3 Quite a bit
	4	4 Extremely
Bbreath	0	0 Not at all
	1	1 A little bit
	2	2 Moderately
	3	3 Quite a bit
	4	4 Extremely
Bnumb	0	0 Not at all
	1	1 A little bit
	2	2 Moderately
	3	3 Quite a bit
	4	4 Extremely
Bweak	0	0 Not at all
	1	1 A little bit
	2	2 Moderately
	3	3 Quite a bit
	4	4 Extremely
Bhotcold	0	0 Not at all
	1	1 A little bit
	2	2 Moderately
	3	3 Quite a bit
	4	4 Extremely
fup	0	Out
	1	In
faint7_a	0	Not at all/a little
	1	At least mod
chestpn7_a	0	Not at all/a little
	1	At least mod
nausea7_a	0	Not at all/a little
	1	At least mod
breath7_a	0	Not at all/a little
	1	At least mod
hotcold7_a	0	Not at all/a little
	1	At least mod
weak7_a	0	Not at all/a little
	1	At least mod
numb7_a	0	Not at all/a little
	1	At least mod
language	1	English
	2	Spanish
	3	Other
occup	1	Nurses
	2	Office workers
	3	Other
non_msabs	0	<=5 days
	1	>5 days
	9	Not known
educ	0	Low educ (<=19)
	1	High educ (20+)
	9	Not known
anyabs	0	0 days
	1	>0 days
	9	Not known
whp1r	0	No
	1	Yes
shp1r	0	No
	1	Yes
elp1r	0	No
	1	Yes
knp1r	0	No
	1	Yes
whp1l	0	No
	1	Yes
shp1l	0	No
	1	Yes
elp1l	0	No
	1	Yes
knp1l	0	No
	1	Yes
